# Supplementary material for: Copper-Catalyzed Reaction of N-Monosubstituted Hydrazones with CBr4: Unexpected Fragmentation and Mechanistic Study
Source: MDPI journal article supplement (doi:10.3390/catal13081194), 2023-08-09
Supplement: s1 [file s1]

Supplementary Materials

**Table S1.** Calculated total electronic energies (E, in Hartree), enthalpies (H, in Hartree), Gibbs free energies (G, in Hartree), and entropies (S, cal/mol•K) for optimized equilibrium model structures.

| Model structure                       | E              | H             | G             | S       |
|---------------------------------------|----------------|---------------|---------------|---------|
| <b>1</b>                              | -816.358361958 | -816.117819   | -816.178472   | 127.654 |
| <b>2_Br</b>                           | -5996.71220908 | -5996.482635  | -5996.552340  | 146.705 |
| <b>2_Cl</b>                           | -1773.56114241 | -1773.331834  | -1773.401249  | 146.096 |
| Br <sup>−</sup>                       | -2571.90789203 | -2571.905532  | -2571.924068  | 39.012  |
| CB <sub>3</sub> <sup>•</sup>          | -7753.26004931 | -7753.248350  | -7753.286662  | 80.635  |
| CBr <sub>4</sub>                      | -10325.0575665 | -10325.042561 | -10325.085068 | 89.462  |
| CCl <sub>3</sub> <sup>•</sup>         | -1418.56433376 | -1418.551659  | -1418.586866  | 74.098  |
| CCl <sub>4</sub>                      | -1878.78478350 | -1878.768628  | -1878.803641  | 73.691  |
| Cl <sup>−</sup>                       | -460.358708951 | -460.356348   | -460.373732   | 36.586  |
| <b>CuBr_TMEDA</b>                     | -4559.89678799 | -4559.652569  | -4559.708592  | 117.911 |
| <b>CuBr<sub>2</sub>_TMEDA</b>         | -7131.68035694 | -7131.431508  | -7131.493391  | 130.244 |
| <b>CuCl_TMEDA</b>                     | -2448.32863479 | -2448.084262  | -2448.139205  | 115.638 |
| <b>CuCl<sub>2</sub>_TMEDA</b>         | -2908.54678204 | -2908.298174  | -2908.355849  | 121.387 |
| <b>D<sup>•</sup>_Br</b>               | -8569.69112888 | -8569.434819  | -8569.510504  | 159.292 |
| <b>D<sup>•</sup>_Cl</b>               | -2234.96570189 | -2234.708842  | -2234.781722  | 153.389 |
| <b>E_Br</b>                           | -8569.08961106 | -8568.845651  | -8568.922449  | 161.634 |
| <b>E_Cl</b>                           | -2234.36324967 | -2234.118237  | -2234.190542  | 152.180 |
| HBr                                   | -2572.34012637 | -2572.330792  | -2572.353332  | 47.440  |
| HCl                                   | -460.785049842 | -460.774993   | -460.796194   | 44.622  |
| <b>H-TMEDA<sup>+</sup></b>            | -348.135595945 | -347.881946   | -347.928326   | 97.615  |
| <b>TMEDA</b>                          | -347.659942884 | -347.423070   | -347.468721   | 96.080  |
| <b>TMEDA (bidentate)</b>              | -347.655366065 | -347.418732   | -347.464518   | 96.364  |
| <i>cis</i> -PhN=N-Br                  | -3117.18108538 | -3117.066630  | -3117.116716  | 105.416 |
| Br <sub>2</sub> C=CHPh                | -5451.84905307 | -5451.723366  | -5451.771268  | 100.819 |
| Cl <sub>2</sub> C=CHPh                | -1228.70992612 | -1228.583501  | -1228.628588  | 94.892  |
| PhN=N <sup>+</sup>                    | -545.249248652 | -545.136741   | -545.181109   | 93.379  |
| <i>trans</i> -PhN=N-Br                | -3117.17710543 | -3117.062389  | -3117.112163  | 104.759 |
| <i>trans</i> -PhN=N-Cl                | -1005.60216064 | -1005.487690  | -1005.537434  | 104.694 |
| PhN=N <sup>+</sup> ...Br <sup>−</sup> | -3117.18001235 | -3117.063242  | -3117.115220  | 109.398 |
| PhN=N <sup>+</sup> ...Cl <sup>−</sup> | -1005.61563945 | -1005.500482  | -1005.553291  | 111.147 |
| <b>F_Br_cis</b>                       | -8133.64321033 | -8133.490294  | -8133.546003  | 117.248 |
| <b>F_Br_trans</b>                     | -8133.64879184 | -8133.495679  | -8133.551527  | 117.541 |
| <b>F_Cl_cis</b>                       | -1798.92218140 | -1798.768727  | -1798.822003  | 112.129 |
| <b>F_Cl_trans</b>                     | -1798.92759102 | -1798.773745  | -1798.827130  | 112.359 |
| N <sub>2</sub>                        | -109.483277565 | -109.474258   | -109.496005   | 45.769  |
| <b>Ph<sup>•</sup></b>                 | -435.936534178 | -435.837526   | -435.878208   | 85.623  |

### X-ray crystal structure determination

The single-crystal X-ray diffraction data for **13** and **13a** were collected on a three-circle Bruker D8 QUEST diffractometer equipped with a PHOTON-III area-detector ( $T = 100$  K,  $\lambda(\text{MoK}\alpha)$ -radiation, graphite monochromator,  $\omega$  and  $\varphi$  scanning mode). The data were indexed and integrated using the *SAINT* program [1], and then scaled and corrected for absorption using the *SADABS* program [2]. For details, see Table S2.

The structures were determined by direct methods and refined by full-matrix least squares technique on  $F^2$  with anisotropic displacement parameters for non-hydrogen atoms. The hydrogen atoms were placed in calculated positions and refined within riding model with fixed isotropic displacement parameters [ $U_{\text{iso}}(\text{H}) = 1.2U_{\text{eq}}(\text{C})$ ]. All calculations were carried out using the *SHELXTL* program [3].

Crystallographic data have been deposited with the Cambridge Crystallographic Data Center, CCDC 2283224 (**13**) and CCDC 2283225 (**13a**). Copies of this information may be obtained free of charge from the Director, CCDC, 12 Union Road, Cambridge CB2 1EZ, UK (Fax: +44 1223 336033; e-mail: deposit@ccdc.cam.ac.uk or [www.ccdc.cam.ac.uk](http://www.ccdc.cam.ac.uk)).

### References

1. Bruker, *SAINT*, v. 8.34A, Bruker AXS Inc., Madison, WI, **2014**.
2. L. Krause, R. Herbst-Irmer, G. M. Sheldrick, D. Stalke, *J. Appl. Cryst.* **2015**, *48*, 3-10.
3. G. M. Sheldrick, *Acta Cryst.* **2015**, *C71*, 3-8.

**Table S2.** Crystal data and structure refinement for the compounds studied.

| Identification code                                                         | 13                                                                  | 13a                                                               |
|-----------------------------------------------------------------------------|---------------------------------------------------------------------|-------------------------------------------------------------------|
| Empirical formula                                                           | C <sub>20</sub> H <sub>14</sub> Br <sub>2</sub> N <sub>2</sub>      | C <sub>14</sub> H <sub>10</sub> Br <sub>2</sub>                   |
| Formula weight                                                              | 442.15                                                              | 338.02                                                            |
| Crystal size, mm                                                            | 0.12 × 0.15 × 0.21                                                  | 0.03 × 0.28 × 0.32                                                |
| Crystal system                                                              | Monoclinic                                                          | Orthorhombic                                                      |
| Space group                                                                 | <i>P</i> 2 <sub>1</sub> / <i>c</i>                                  | <i>P</i> 2 <sub>1</sub> 2 <sub>1</sub> 2 <sub>1</sub>             |
| <i>a</i> , Å                                                                | 11.0375(2)                                                          | 5.6315(4)                                                         |
| <i>b</i> , Å                                                                | 13.9184(3)                                                          | 7.5030(5)                                                         |
| <i>c</i> , Å                                                                | 11.3778(2)                                                          | 27.5643(19)                                                       |
| $\alpha$ , deg.                                                             | 90                                                                  | 90                                                                |
| $\beta$ , deg.                                                              | 94.1279(6)                                                          | 90                                                                |
| $\gamma$ , deg.                                                             | 90                                                                  | 90                                                                |
| <i>V</i> , Å <sup>3</sup>                                                   | 1743.37(6)                                                          | 1164.68(14)                                                       |
| <i>Z</i>                                                                    | 4                                                                   | 4                                                                 |
| Density (calc.), g/cm <sup>3</sup>                                          | 1.684                                                               | 1.928                                                             |
| $\mu$ , mm <sup>-1</sup>                                                    | 4.653                                                               | 6.926                                                             |
| <i>F</i> (000)                                                              | 872                                                                 | 656                                                               |
| Theta range, deg.                                                           | 2.316 – 32.687                                                      | 3.091 – 32.439                                                    |
| Index ranges                                                                | -16 ≤ <i>h</i> ≤ 16,<br>-21 ≤ <i>k</i> ≤ 21,<br>-17 ≤ <i>l</i> ≤ 17 | -8 ≤ <i>h</i> ≤ 8,<br>-11 ≤ <i>k</i> ≤ 11,<br>-41 ≤ <i>l</i> ≤ 41 |
| Reflections collected                                                       | 60091                                                               | 21006                                                             |
| Independent reflections, <i>R</i> <sub>int</sub>                            | 6378, 0.0293                                                        | 4139, 0.0902                                                      |
| Reflections observed                                                        | 5792                                                                | 3216                                                              |
| <i>R</i> <sub>1</sub> / <i>wR</i> <sub>2</sub> ( <i>I</i> > 2σ( <i>I</i> )) | 0.0195 / 0.0466                                                     | 0.0489 / 0.0936                                                   |
| <i>R</i> <sub>1</sub> / <i>wR</i> <sub>2</sub> (all data)                   | 0.0233 / 0.0478                                                     | 0.0743 / 0.1023                                                   |
| Goodness-of-fit on <i>F</i> <sup>2</sup>                                    | 1.035                                                               | 1.043                                                             |
| Extinction coefficient                                                      | 0.0010(1)                                                           | 0.0062(6)                                                         |
| <i>T</i> <sub>min</sub> / <i>T</i> <sub>max</sub>                           | 0.404 / 0.565                                                       | 0.112 / 0.716                                                     |
| $\Delta\rho_{\max}$ / $\Delta\rho_{\min}$ , e <sup>-</sup> Å <sup>-3</sup>  | 0.706 / -0.710                                                      | 1.592 / -0.942                                                    |
